# Supplementary material
Source: publisher site journal article supplement (http://www.degruyter.com/publication/journal_key/COMM/downloadAsset/COMM_Instructions_for_Book_Reviewers.pdf)
Supplement: Supplementary file 1 [file COMM_Instructions_for_Book_Reviewers.pdf]

# INSTRUCTIONS FOR BOOK REVIEWERS

Dear Reviewer,

Thanks again for your contribution to *Communications: The European Journal of Communication Research*. In helping with your book review here are some guidelines regarding (1) content and style as well as regarding (2) the submission of your review.

## 1. PRACTICAL GUIDELINES

**Word count:** we would like to stress that single book reviews should be **between 800 and 1000 words**.

**Heading:** title of book under review, author, name of publisher, place of publication (including state if USA), year of publication, number of pages.

**Style:** please use Times New Roman, font size 12 and single line spacing.

**Content of the book review:** reviewers are asked to address the following in their book review.

(1) Description: this includes the overall argument(s), the approach, themes covered, case studies, and the expected readership.

(2) Evaluation: does the book succeed in its goals? Does it make an original and noteworthy contribution to the field of communication science and/or a specific subdiscipline? Does it move forward any understandings or debates around empirical or theoretical issues? What are the book's failings?

(3) Looking forward: does the book's argument and analysis invite exploration of further cases or approaches? Is the book likely to have an impact on others in the field, and if so, how?

(4) Relevance: in which respect is the book particularly relevant for the European field of communication research?

**Notes:** endnotes or additional references to be kept to an absolute minimum. If they are essential, they should follow the format prescribed for full-length articles for the journal (see <http://www.communicationsonline.eu/>).

**Reviewer information:** reviewers should supply their name, title, institutional affiliation, full postal address, email, phone and fax numbers at the end of the typescript and different address for proofs or offprints, if relevant. Reviewers should supply their e-mail addresses so that production editors can send proofs to reviewers for checking (if relevant), and send offprints direct to the reviewers.

## 2. SUBMISSION OF YOUR REVIEW

Reviewers need to submit their book review via the **ScholarOne Manuscript platform**, via <https://mc.manuscriptcentral.com/comm>, log in or create an account, and select 'Book review' in 'Step 1: Type, Title, & Abstract'. Please follow the instructions carefully when uploading your document. We kindly ask you to submit your manuscript, presented in the format specified, before the **deadline** as agreed with the book review editors. The review editors reserve the right to make minor editorial changes to the submitted text, but substantive

alterations will be made only in consultation with the reviewer following a requested revision via the ScholarOne platform. Publication of a review in any specific issue of the journal cannot be guaranteed.

Many thanks for your contribution to our journal!
